# Supplementary material
Source: HighWire-hosted journal article supplement (https://bmjopen.bmj.com/content/12/6/e058074)
Supplement: inline-supplementary-material-1 [file inline-supplementary-material-1.pdf]

Supplementary Table 1. Characteristics of participants based on phone call success for telephone interviews

| Characteristics          | Phone call success |             |
|--------------------------|--------------------|-------------|
|                          | Yes (n=2894)       | No (n=1401) |
| Covide-19 confirmed case | 45%                | 40%         |
| Age group                |                    |             |
| < 18 years               | 13%                | 11%         |
| 18 – 30 years            | 28%                | 26%         |
| 31 – 40 years            | 24%                | 25%         |
| 41 – 50 years            | 17%                | 17%         |
| 51 – 60 years            | 11%                | 14%         |
| > 60 years               | 7%                 | 8%          |
| Female sex               | 46%                | 48%         |
| Fever                    | 56%                | 58%         |
| Cough                    | 48%                | 48%         |
| Cold                     | 7%                 | 10%         |
| Shortness of Breath      | 4%                 | 3%          |
| Body ache                | 4%                 | 2%          |
| Headache                 | 0.5%               | 0.5%        |
| Sore throat              | 7%                 | 7%          |
| Weakness                 | 0.3%               | 0.3%        |
| Anosmia                  | 1%                 | 1%          |
| Loose motion             | 0.6%               | 1%          |
| Runny nose               | 0.5%               | 0.3%        |

Supplementary Table 2. Baseline characteristics of non-hospitalized COVID-19 test positives and test negatives

| Characteristics                        | n    | COVID-19   |            |
|----------------------------------------|------|------------|------------|
|                                        |      | Negative   | Positive   |
| Age group, n (%)                       | 4149 |            |            |
| < 18 years                             |      | 335 (14%)  | 194 (10%)  |
| 18 – 30 years                          |      | 689 (29%)  | 472 (27%)  |
| 31 – 40 years                          |      | 579 (24%)  | 418 (23%)  |
| 41 – 50 years                          |      | 404 (17%)  | 299 (17%)  |
| 51 – 60 years                          |      | 266 (11%)  | 209 (12%)  |
| > 60 years                             |      | 125 (5%)   | 159 (9%)   |
| Female sex, n (%)                      | 4159 | 1088 (45%) | 853 (49%)  |
| BCG scar, n (%)                        | 2772 | 1285 (82%) | 1007 (83%) |
| ABO Blood group, n (%)                 | 2619 |            |            |
| A                                      |      | 355 (24%)  | 262 (23%)  |
| B                                      |      | 477 (32%)  | 397 (35%)  |
| AB                                     |      | 116 (8%)   | 127 (11%)  |
| O                                      |      | 520 (35%)  | 365 (32%)  |
| <b>Pre-existing chronic disease</b>    |      |            |            |
| COPD/Asthma/Respiratory illness, n (%) | 2815 | 164 (11%)  | 115 (9%)   |
| Hypertension, n (%)                    | 2816 | 259 (16%)  | 262 (21%)  |
| Ischemic heart disease (IHD), n (%)    | 2814 | 57 (4%)    | 57 (5%)    |
| Chronic liver disease (CLD), n (%)     | 2814 | 20 (1%)    | 15 (1%)    |
| Diabetes mellitus (DM), n (%)          | 2816 | 186 (12%)  | 167 (13%)  |
| Hypothyroidism, n (%)                  | 2814 | 57 (4%)    | 53 (4%)    |
| Chronic kidney disease (CKD), n (%)    | 2813 | 23 (1%)    | 27 (2%)    |
| Physical activity                      | 2772 |            |            |
| No                                     |      | 926 (60%)  | 710 (58%)  |
| Mild                                   |      | 515 (33%)  | 428 (35%)  |
| Moderate                               |      | 62 (4%)    | 59 (5%)    |
| Vigorous                               |      | 48 (3%)    | 24 (2%)    |
| <b>Presenting symptoms</b>             | 4159 |            |            |
| Fever, n (%)                           |      | 1125 (47%) | 1218 (70%) |

|                            |            |           |
|----------------------------|------------|-----------|
| Cough, n (%)               | 1133 (47%) | 886 (51%) |
| Cold, n (%)                | 199 (8%)   | 137 (8%)  |
| Shortness of Breath, n (%) | 104 (4%)   | 38 (2%)   |
| Body ache, n (%)           | 68 (3%)    | 64 (4%)   |
| Headache, n (%)            | 11 (0.5%)  | 9 (0.5%)  |
| Sore throat, n (%)         | 207 (9%)   | 102 (6%)  |
| Weakness, n (%)            | 6 (0.3%)   | 6 (0.3%)  |
| Anosmia, n (%)             | 16 (0.7%)  | 33 (2%)   |
| Loose motion, n (%)        | 20 (0.8%)  | 17 (1%)   |
| Runny nose, n (%)          | 14 (0.6%)  | 5 (0.3%)  |
